# Supplementary material for: Electroconvulsive Shock, but Not Transcranial Magnetic Stimulation, Transiently Elevates Cell Proliferation in the Adult Mouse Hippocampus
Source: MDPI journal article supplement (doi:10.3390/cells10082090), 2021-08-14
Supplement: s1 [file s1]

## BrdU

A

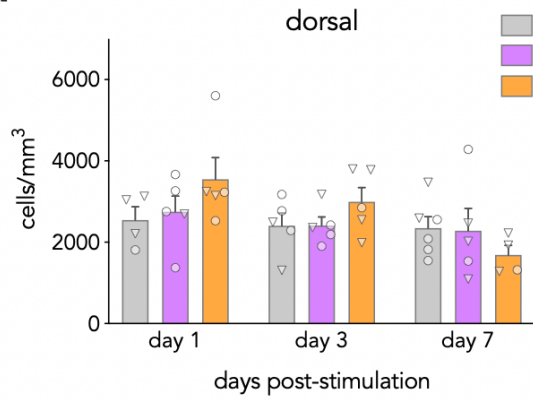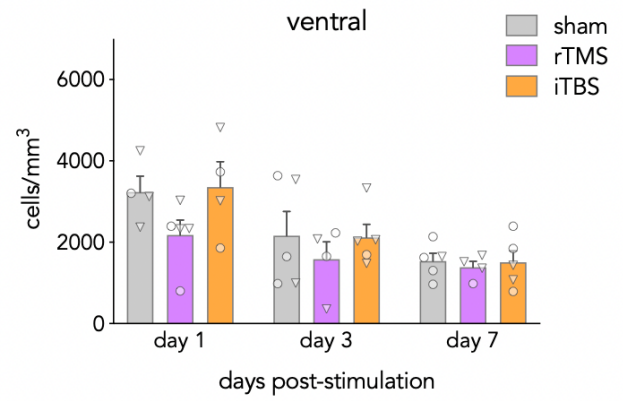

## PCNA

B

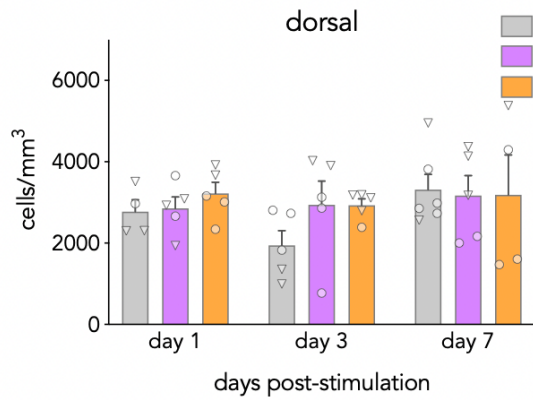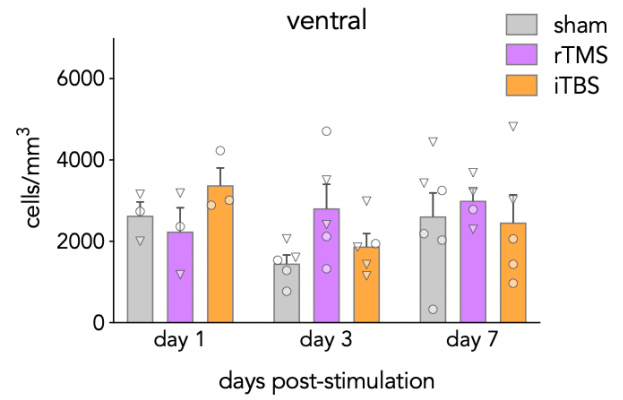

## DCX

C

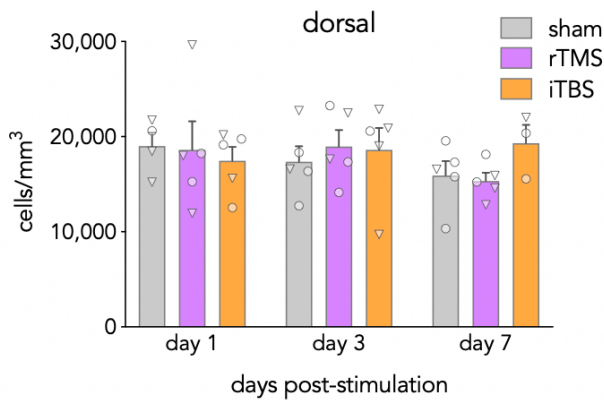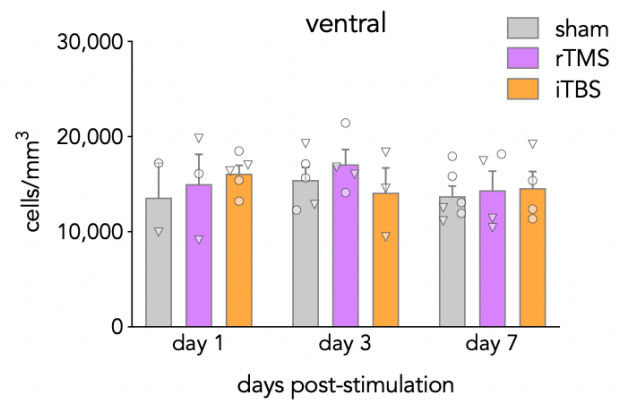

**Supplementary Figure 1: Timecourse of neurogenesis, in the dorsal and ventral dentate gyrus, following one session of rTMS and iTBS.** A) BrdU+ cell densities did not vary as a function of dorsoventral subregion (sham vs rTMS 3 way ANOVA: dorsoventral main effect and interactions all  $P > 0.11$ ; sham vs iTBS 3 way ANOVA: dorsoventral main effect and interactions all  $P > 0.22$ ). B) PCNA+ cell densities did not vary as a function of dorsoventral subregion (sham vs rTMS 3 way ANOVA: dorsoventral main effect and interactions all  $P > 0.10$ ; sham vs iTBS 3 way ANOVA: dorsoventral main effect and interactions all  $P > 0.09$ ). C) DCX+ cell densities were greater in the dorsal dentate gyrus but dorsoventral differences were not modulated by treatment or time post-stimulation (sham vs rTMS 3 way ANOVA; dorsoventral effect:  $P = 0.04$ ; sham vs iTBS 3 way ANOVA; dorsoventral effect:  $P = 0.004$ ; all dorsoventral interactions  $P > 0.3$ ). Bars reflect mean  $\pm$  standard error. Triangles indicate female mice, circles indicate male mice.
